# Supplementary figures and images for: Mutational and low-coverage whole genome sequencing identifies actionable DNA repair alterations in prostate cancer plasma DNA
Source: Springer Nature journal article supplement (doi:10.1038/s41598-025-05384-4), 2025-07-01

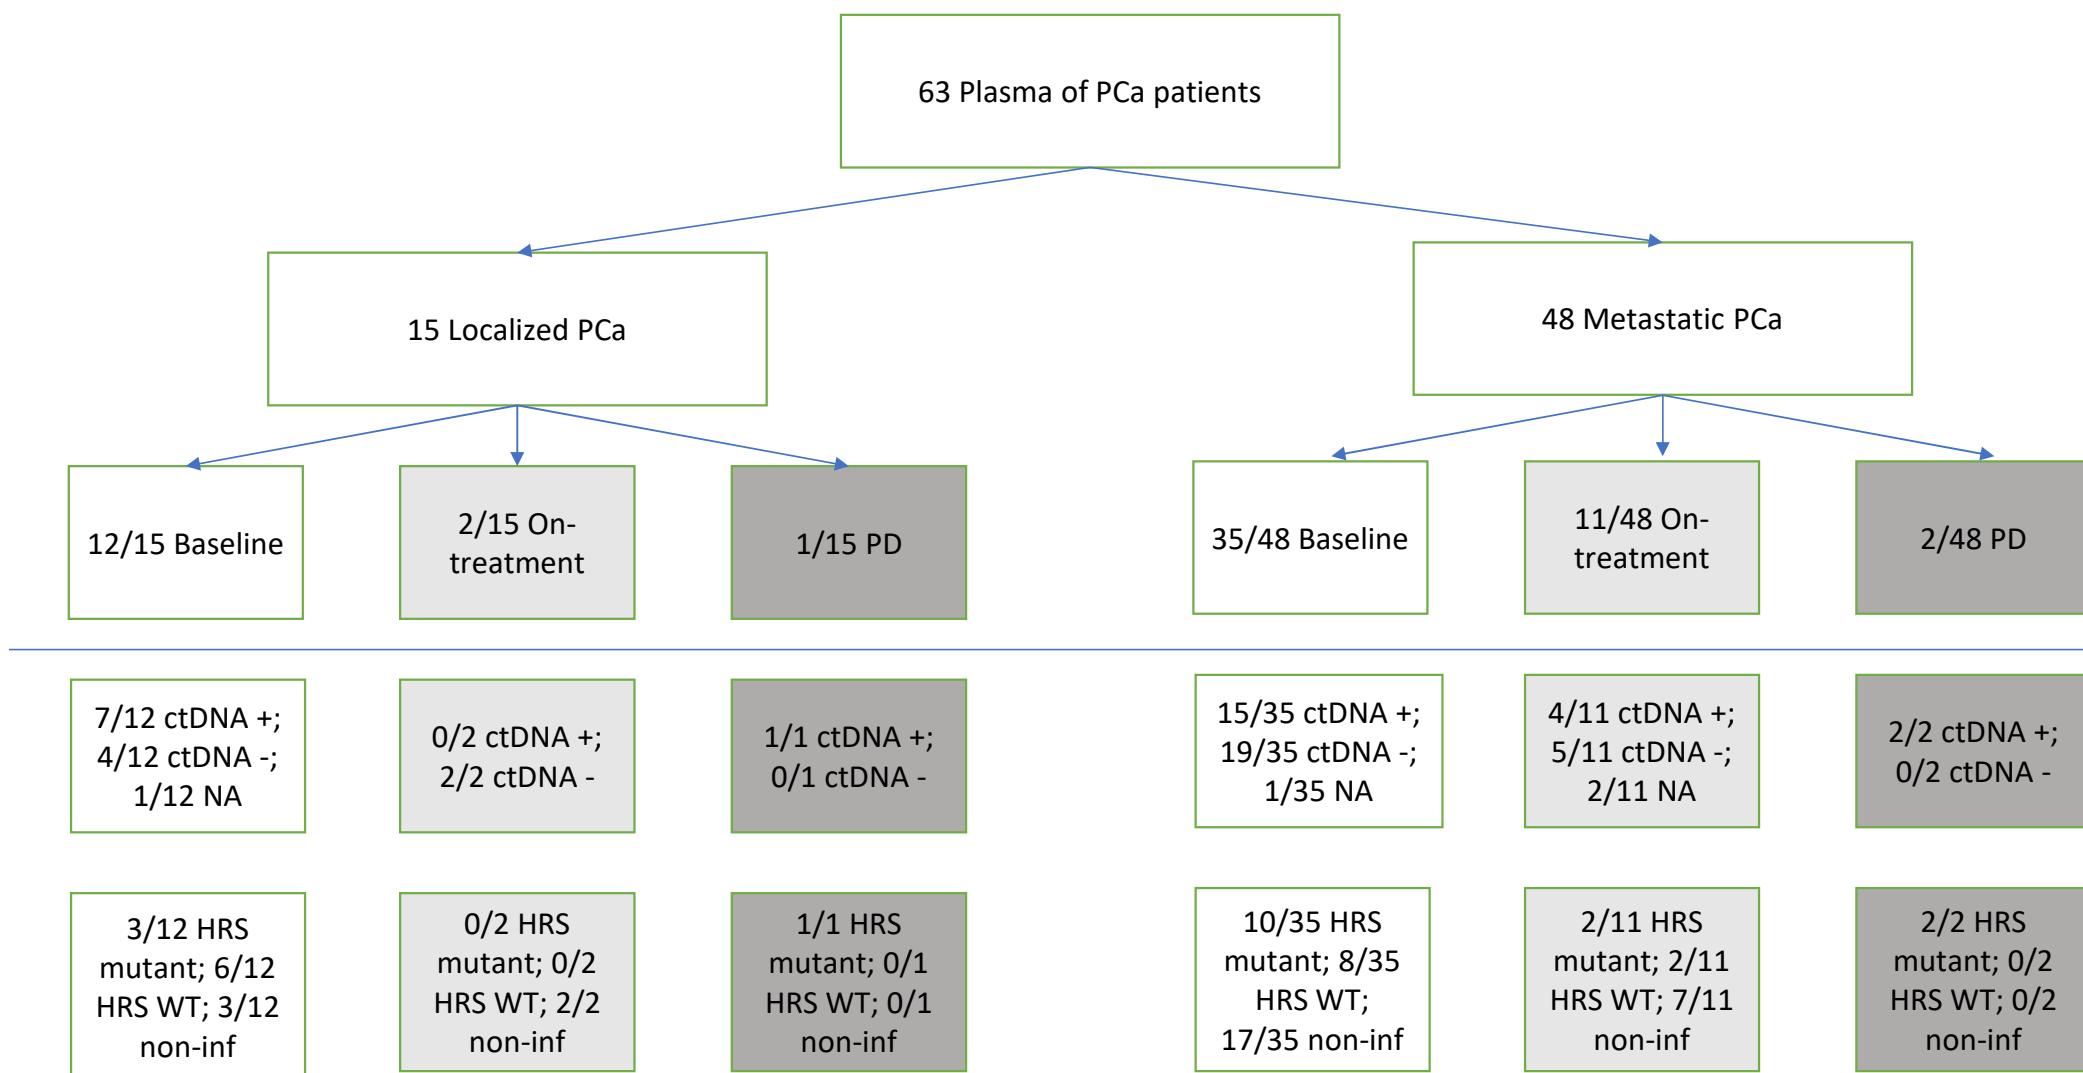

Supplement: MOESM7 [file 41598_2025_5384_MOESM7_ESM.pdf › 41598_2025_5384_MOESM7_ESM.pdf]
